# Supplementary material for: Evolutionary engineering of a wine yeast strain revealed a key role of inositol and mannoprotein metabolism during low-temperature fermentation
Source: PubMed Central journal article supplement (PMC4509780; doi:10.1186/s12864-015-1755-2), 2015-07-22

**A.1**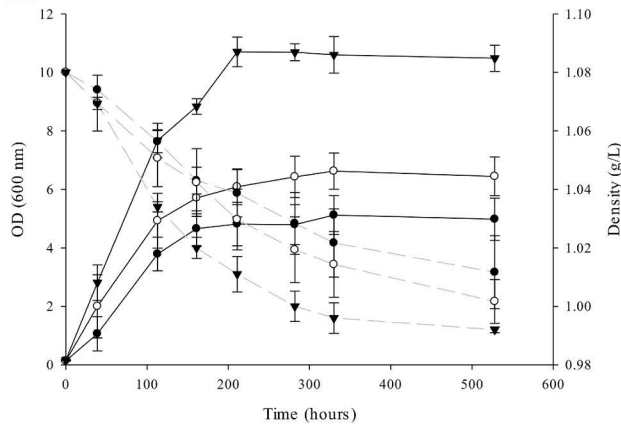**A.2**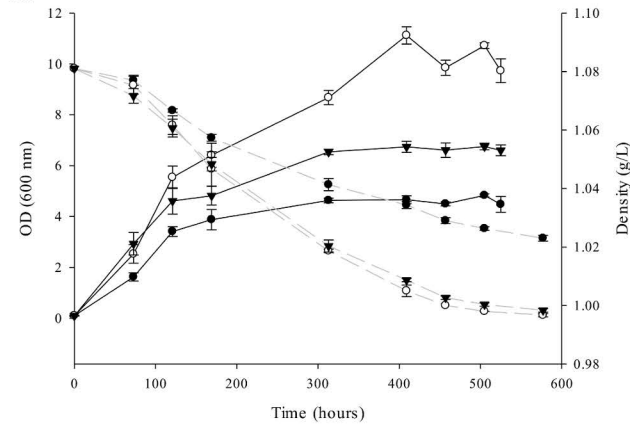**B.1**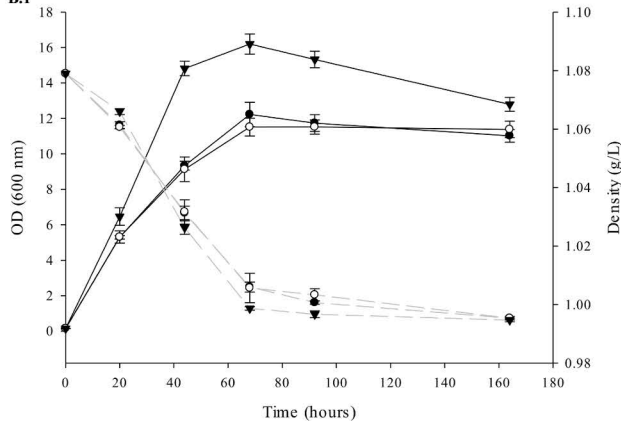**B.2**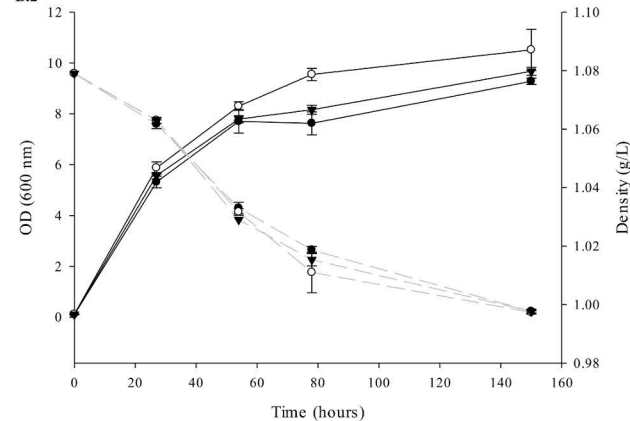

Supplement: 12864_2015_1755_MOESM2_ESM.pdf [file 12864_2015_1755_MOESM2_ESM.pdf]
