# Supplementary material for: Evolutionary engineering of a wine yeast strain revealed a key role of inositol and mannoprotein metabolism during low-temperature fermentation
Source: PubMed Central journal article supplement (PMC4509780; doi:10.1186/s12864-015-1755-2), 2015-07-22

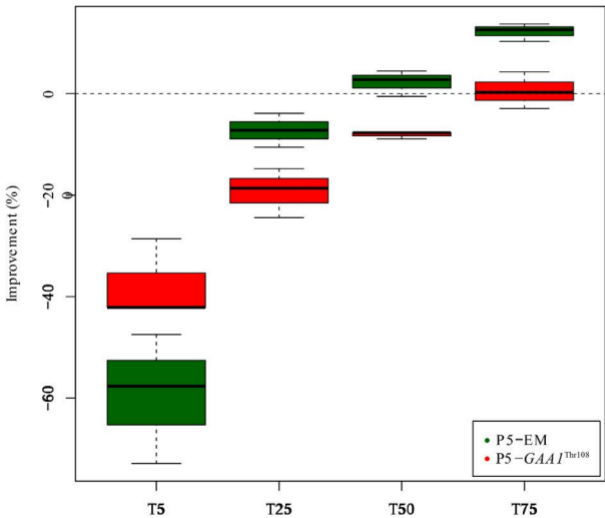

Supplement: 12864_2015_1755_MOESM8_ESM.pdf [file 12864_2015_1755_MOESM8_ESM.pdf]
